# Supplementary material for: Synergistic Effects of Silicate-Platelet Supporting Ag and ZnO, Offering High Antibacterial Activity and Low Cytotoxicity
Source: MDPI journal article supplement (doi:10.3390/ijms24087024), 2023-04-10
Supplement: s1 [file s1]

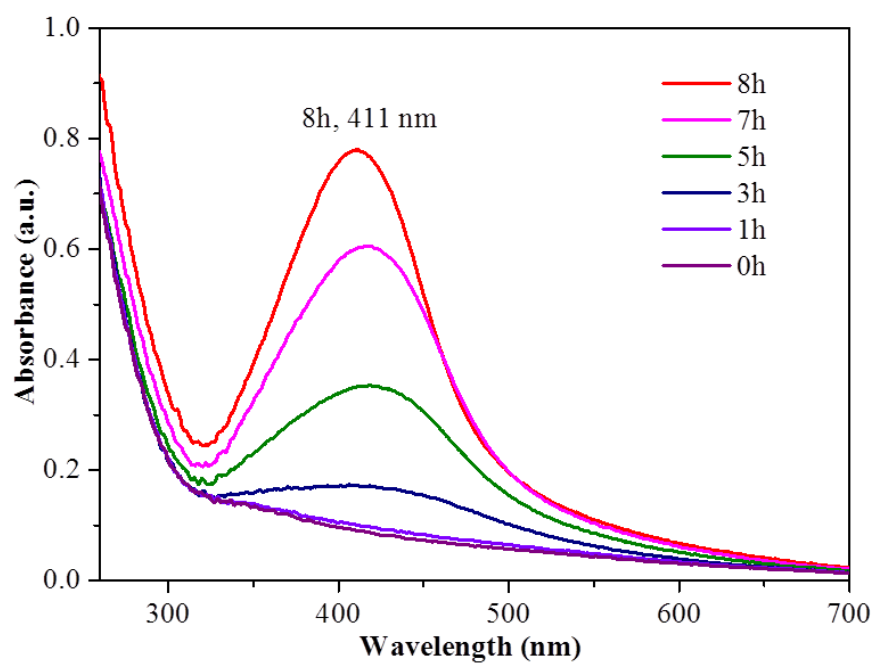

**Figure S1.** Kinetic measurements of nanoparticle formation at 411 nm UV-Vis absorption for AgNP/NSP (1/99, w/w) during the reduction of AgNO<sub>3</sub>.

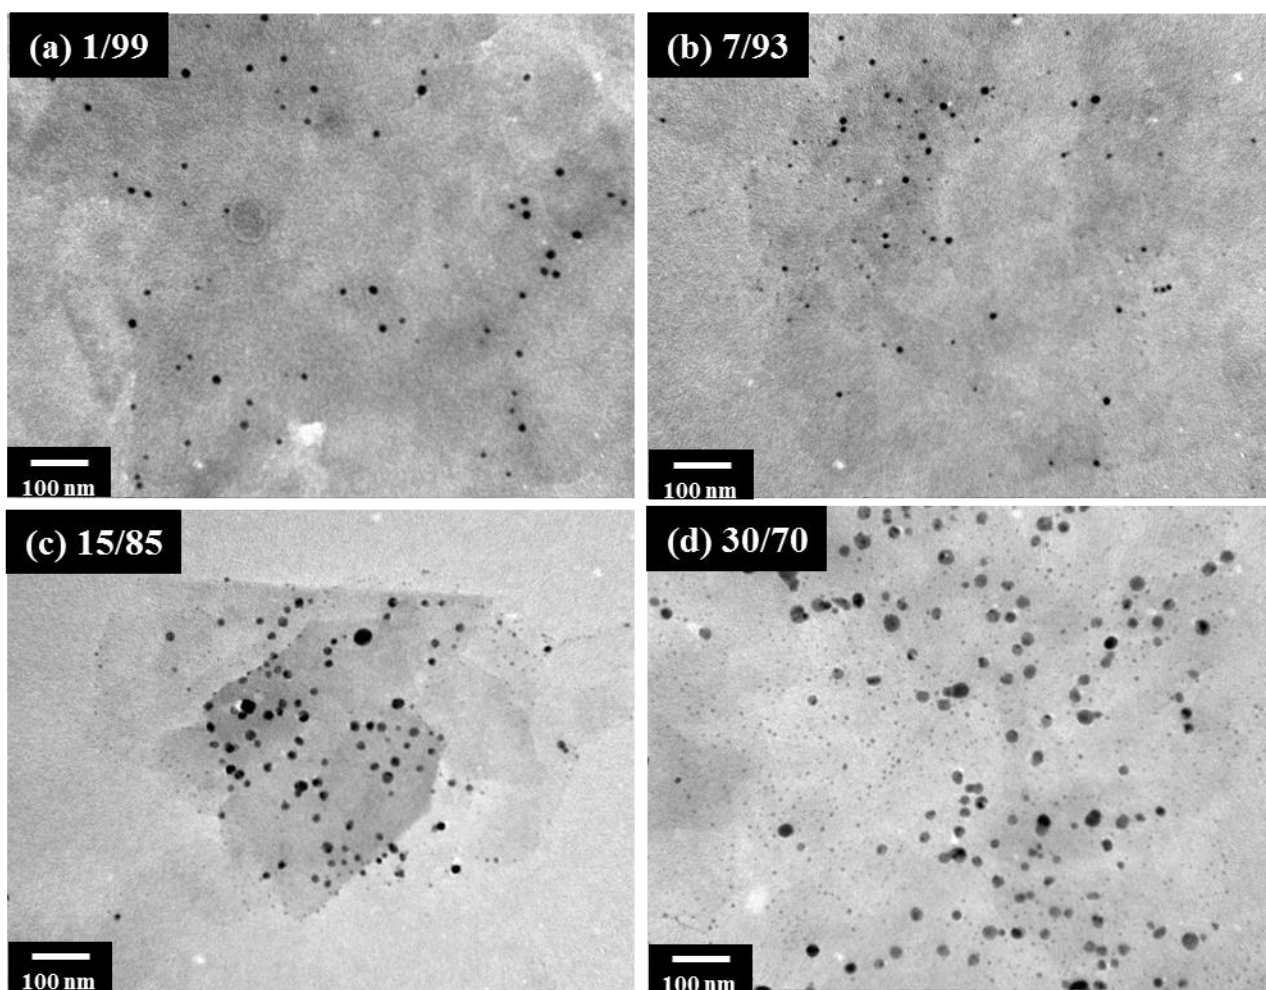

**Figure S2.** TEM images of AgNP and NSP in the AgNP/NSP hybrids at weight ratios of (a)

1/99 (b) 7/93 (c) 15/85 (d) 30/70

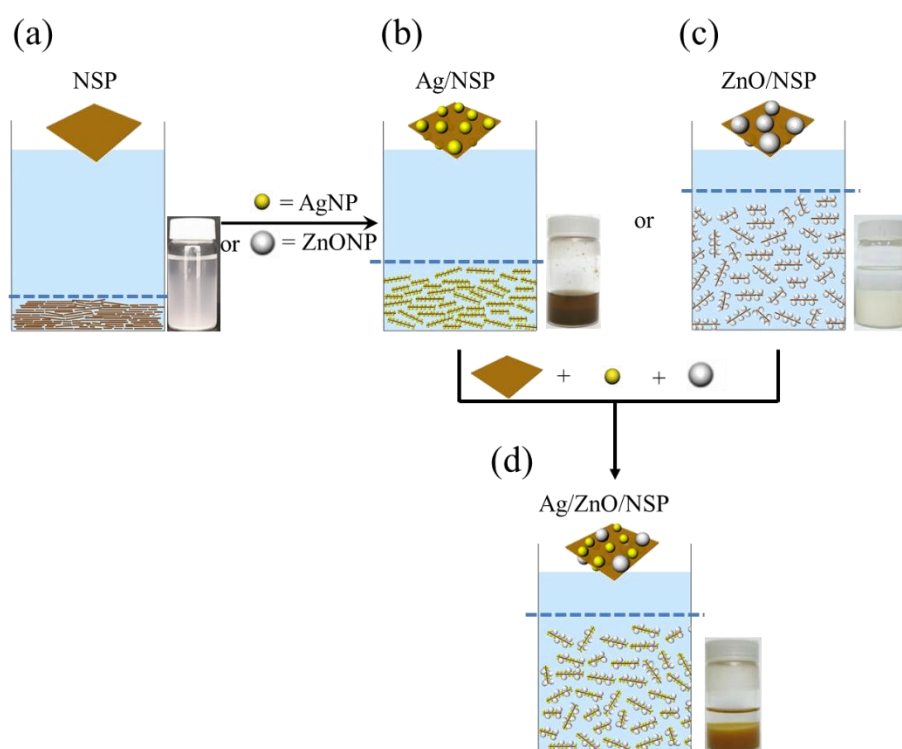

**Figure S3.** Conceptual illustration of (a) NSP, (b) Ag/NSP, (c) ZnO/NSP, (d) Ag/ZnO/NSP after resting for 3h.

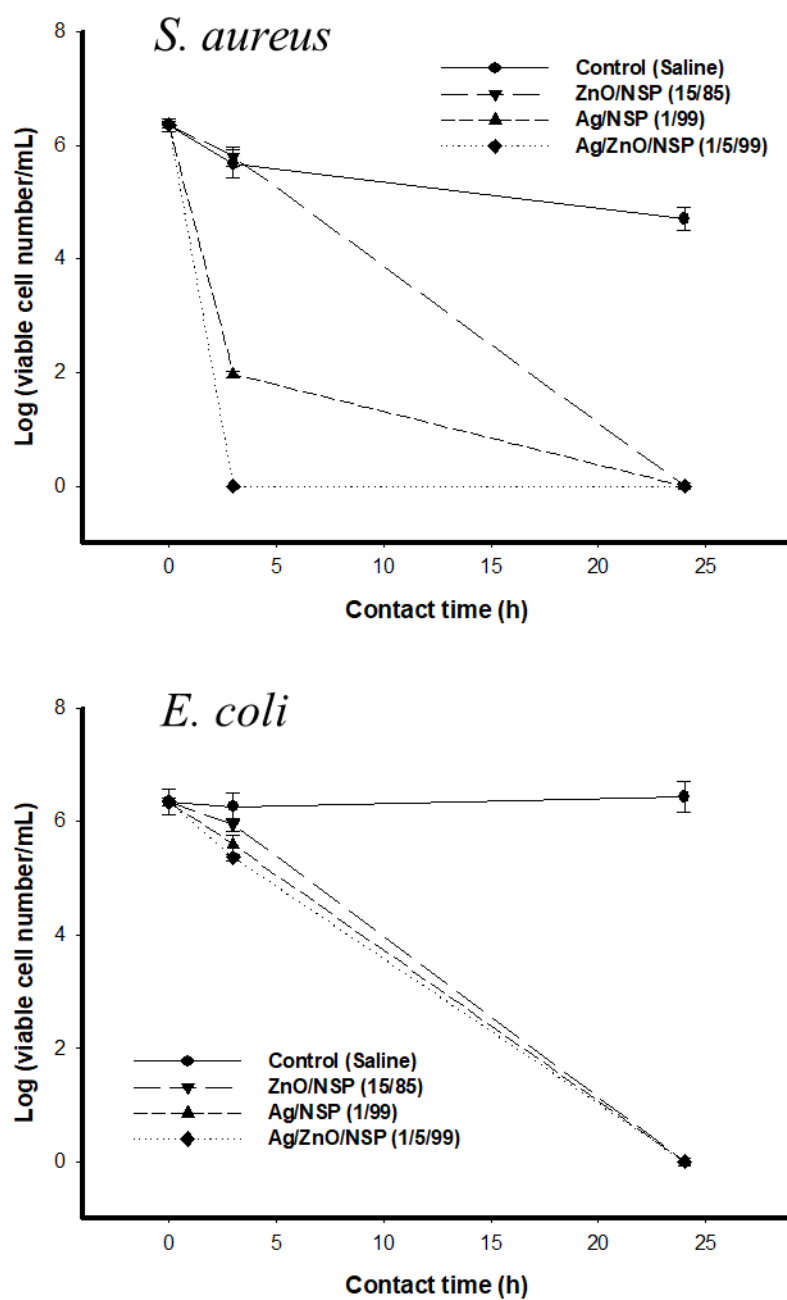

**Figure S4.** Antibacterial efficacies against *S. aureus* (Top) and *E. coli* (Bottom) in contact with three selected hybrids at their minimum bactericidal concentrations (MBC) for 0-24 h. The antibacterial efficacy: AgNP/ZnONP/NSP > AgNP/NSP > ZnONP/NSP.
